# Supplementary material
Source: PubMed Central journal article supplement (PMC3580180)
Supplement: NIHMS394114-supplement-01.pdf [file NIHMS394114-supplement-01.pdf]

## INSERT LINK TO ONLINE FILES

Supplementary Table: Adjusted mean differences ( $\pm$  standard error) of body mass index (BMI) by income among women in the Jackson Heart Study, 2000--2004.

|        | Model 1             | Model 2             | Model 3             | Model 4             | Model 5             | Model 6             |
|--------|---------------------|---------------------|---------------------|---------------------|---------------------|---------------------|
| BMI    |                     |                     |                     |                     |                     |                     |
| Income | -2.45 $\pm$ 0.43*** | -2.35 $\pm$ 0.43*** | -2.35 $\pm$ 0.43*** | -2.29 $\pm$ 0.43*** | -2.41 $\pm$ 0.44*** | -2.22 $\pm$ 0.44*** |
| GPSS   | -                   | 0.34 $\pm$ 0.17*    | -                   | 0.25 $\pm$ 0.17     | -                   | 0.40 $\pm$ 0.17*    |
| NLE    | -                   | -                   | 0.41 $\pm$ 0.16**   | 0.36 $\pm$ 0.16*    | -                   | 0.34 $\pm$ 0.16*    |

Abbreviations: GPSS = Global perceived stress scale; NLE = Negative life events.

BMI (continuous), Income (difference between the 10th and the 90th percentile), and GPSS & NLE (continuous, GPSS in 4.38 values of SD and NLE in 1.21 values of SD).

Model 1: Age + Income; Model 2: Age + Income + GPSS; Model 3: Age + Income + NLE; Model 4: Age + Income + GPSS + NLE; Model 5: Age + Income + Behaviors; Model 6: Age + Income + GPSS + NLE + Behaviors.

\*\*\*  $p < 0.0001$ ; \*\*  $0.0001 < p < 0.01$ ; \*  $p < 0.05$ .
